# Supplementary material
Source: HighWire-hosted journal article supplement (https://emj.bmj.com/content/35/4/226)
Supplement: inline-supplementary-material-2 [file inline-supplementary-material-2.docx]

**DOI:**10.1136/emermed-2017-207207

*This abstract has been translated and adapted from the original English-language content. Translated content is provided on an "as is" basis. Translation accuracy or reliability is not guaranteed or implied.  BMJ is not responsible for any errors and omissions arising from translation to the fullest extent permitted by law, BMJ shall not incur any liability, including without limitation, liability for damages, arising from the translated text.*

**Abstract**

**Introductie**Orthostase is een frequente trigger voor (pre)syncope maar sommige vormen van orthostatische (pre)syncope hebben een slechtere prognose dan andere. Routinematige beoordeling van de orthostatische bloeddruk op de spoedeisende hulp (SEH) kan klassieke orthostatische hypotensie detecteren, maar mist vaak andere vormen van orthostatische (pre)syncope. Deze studie beoogde de frequentie van abnormale orthostatische bloeddruk herstelpatronen in (pre)syncope patiënten te bepalen met behulp van continue niet-invasieve bloeddrukmeting.

**Methoden**Deze prospectieve cohort studie was uitgevoerd in patiënten die met de verdenking (pre)syncope waren verwezen naar de SEH van een academisch ziekenhuis in de periode van januari tot en met augustus 2014. Orthostatische bloeddruk werd gemeten gedurende de actieve liggen-naar-staan test met Nexfin®, een continue niet-invasieve vinger bloeddrukmeter. Orthostatische bloeddruk herstelpatronen werden gedefinieerd als normaal herstelpatroon, initiële orthostatische hypotensie, vertraagd herstelpatroon, klassieke orthostatische hypotensie en reflex-gemedieerde hypotensie.

**Resultaten**Van de 116 geïncludeerde patiënten, waren de metingen van 111 patiënten (gemiddelde leeftijd 63 jaar, 51% man) geschikt voor analyse. Klassieke orthostatische hypotensie was het meest prevalente abnormale bloeddruk herstelpatroon (19%) hoewel maar de helft van de patiënten uiteindelijk de diagnose orthostatische hypotensie kreeg. Initiële orthostatische hypotensie en vertraagd bloeddruk herstelpatroon waren aanwezig in 20% van de (pre)syncope patiënten waarvan 45% de diagnose syncope door onbekende oorzaak kregen. Reflex-gemedieerde hypotensie was aanwezig in 4% van de patiënten.

**Conclusie**Continue niet-invasieve bloeddrukmeting kan potentieel meer specifieke en verontrustende oorzaken van orthostatische (pre)syncope identificeren. Correcte classificatie is belangrijk vanwege de verschillende korte en lange termijn klinische implicaties.
